# Supplementary material for: Swelling of phospholipid membranes by divalent metal ions depends on the location of the ions in the bilayers
Source: Royal Society of Chemistry journal article supplement (doi:10.1039/c6sm00695g), 2016-01-01
Supplement: c6sm00695g1.pdf [file c6sm00695g1.pdf]

776  
777 **Supplementary Information to:**  
778 **Swelling of Phospholipid Membranes by Divalent**  
779 **Metal Ions Depends on the Location of the Ions in**  
**the Bilayers**

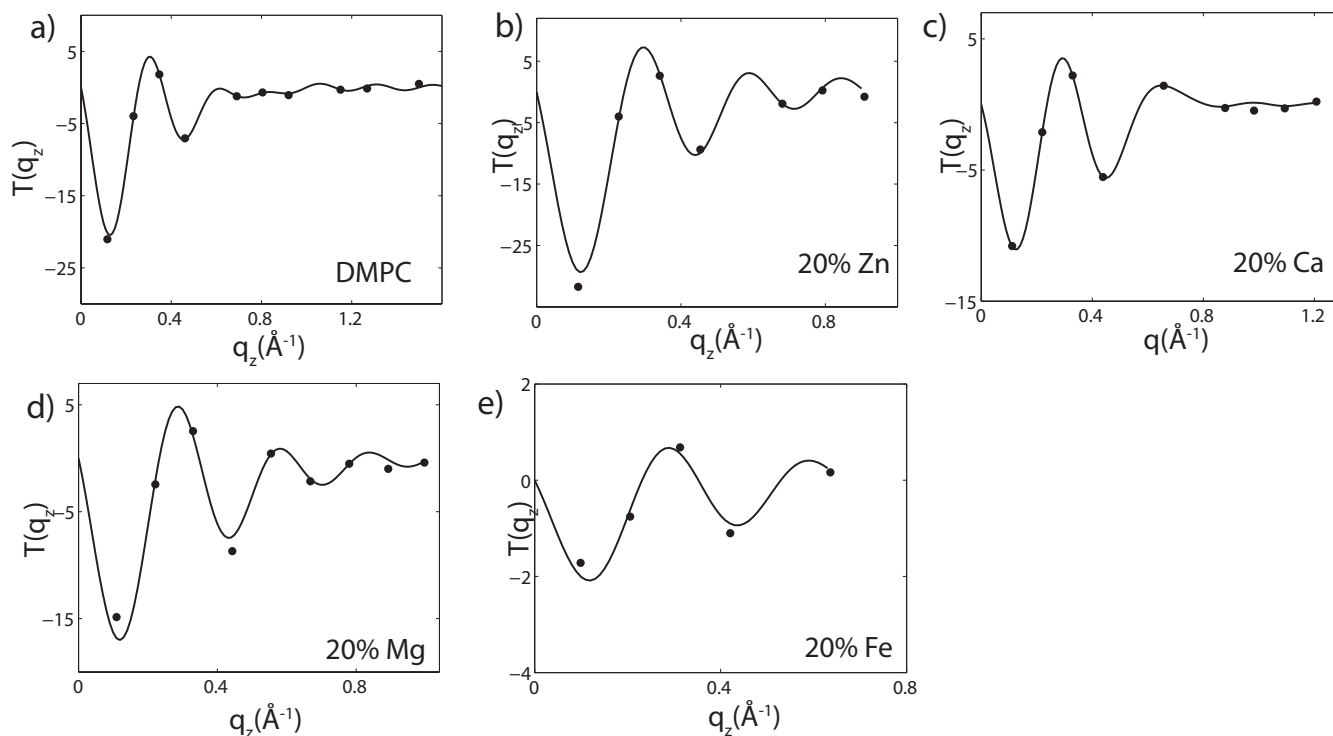

Supplemental Material, Figure S1. Function  $T(z)$  for membrane complexes with a) pure DMPC; b) 20mol%  $\text{Zn}^{2+}$ ; c) 20mol%  $\text{Ca}^{2+}$ ; d) 20mol%  $\text{Mg}^{2+}$ ; e) 20mol%  $\text{Fe}^{2+}$ . The Fourier phases  $\nu_n$  were assessed from these figures.
